# Supplementary material for: Development of a Polymicrobial Checkerboard Assay as a Tool for Determining Combinatorial Antibiotic Effectiveness in Polymicrobial Communities
Source: MDPI journal article supplement (doi:10.3390/antibiotics12071207), 2023-07-20
Supplement: s1 [file s1]

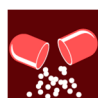

Supplementary Materials:

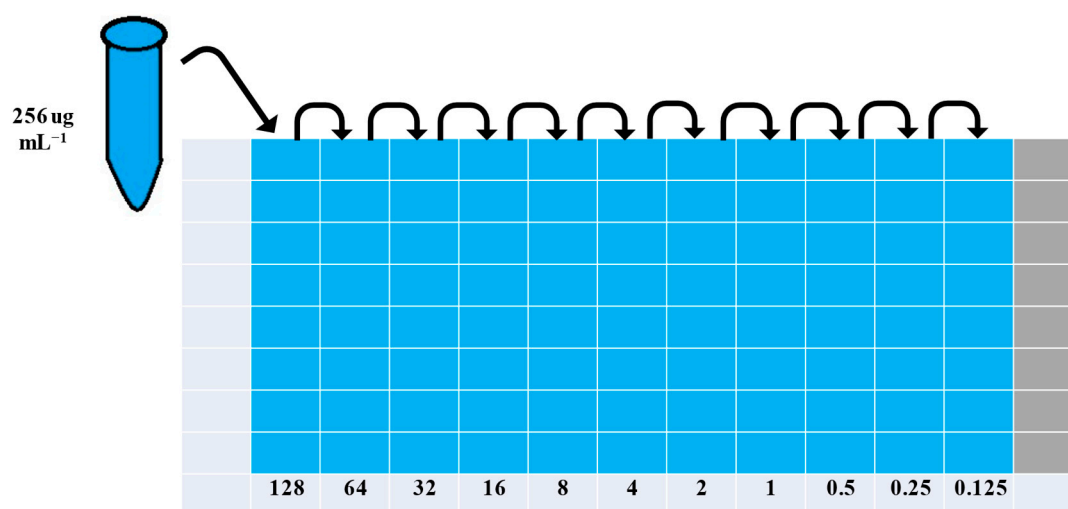

**Supplementary Figure S1.** Methods for diluting both antimicrobials start with a  $256 \mu\text{g mL}^{-1}$  stock, followed by 1:2 dilutions to a concentration of  $0.125 \mu\text{g mL}^{-1}$ . Depiction of serial dilutions performed for both antimicrobials. A total of  $100 \mu\text{L}$  of a  $256 \mu\text{g mL}^{-1}$  stock was diluted out in  $100 \mu\text{L}$  of CAMHB (1:2 dilutions) to a final concentration of  $0.125 \mu\text{g mL}^{-1}$ ;  $45 \mu\text{L}$  of each dilution was then added to the checkerboard itself.

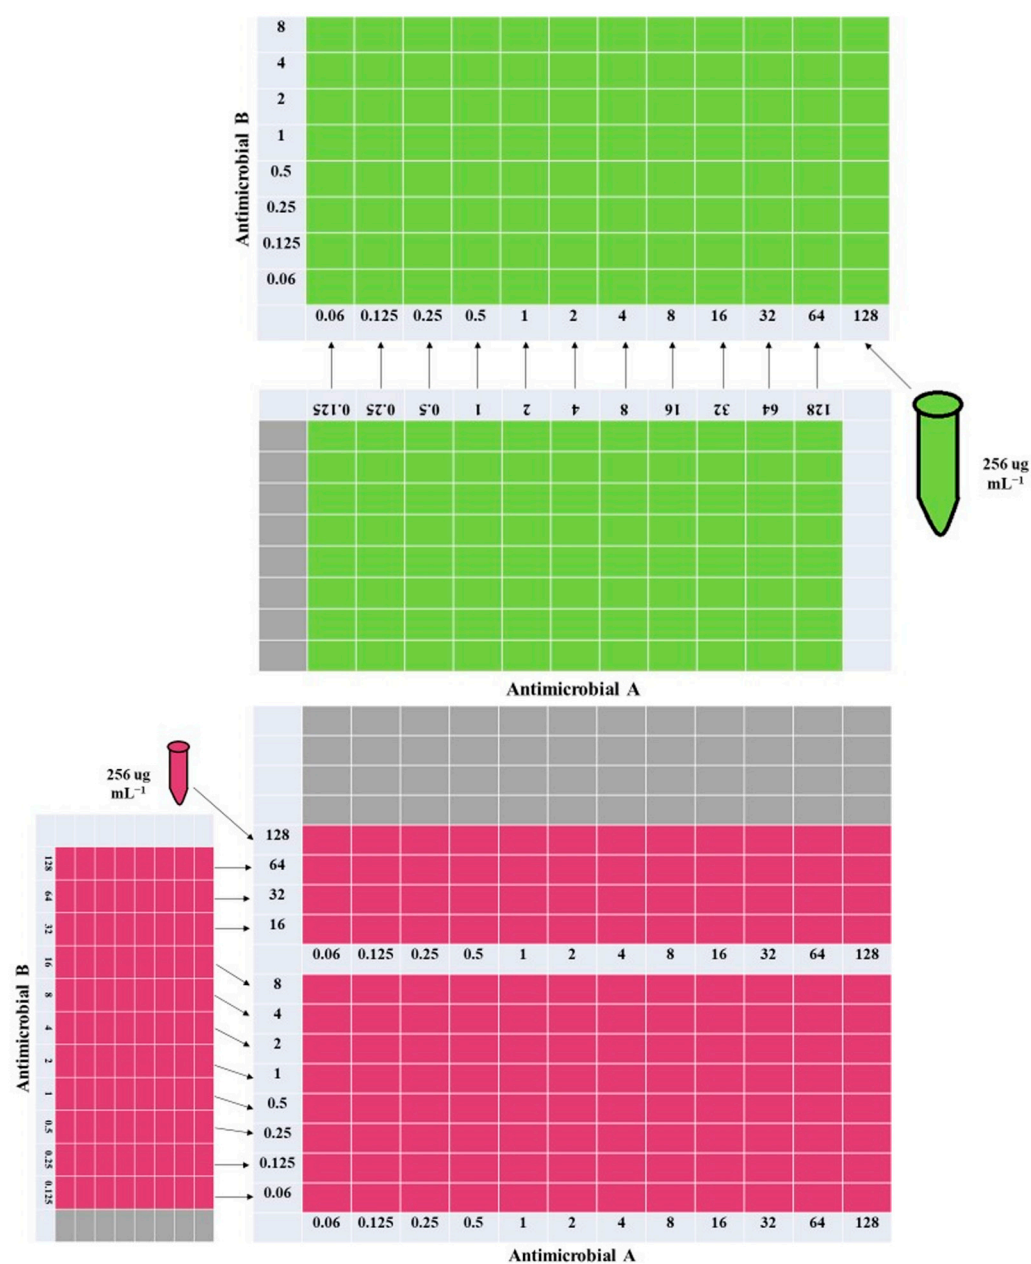

**Supplementary Figure S2.** Checkerboard setup has one antimicrobial in rows and one antimicrobial in columns, both with varying concentrations. Each well in the checkerboard received 45  $\mu$ L of each antimicrobial from a well, one concentration higher than desired. For example, if a concentration of 4  $\mu$ g mL<sup>-1</sup> was desired, 45  $\mu$ L would be taken from the 8  $\mu$ g mL<sup>-1</sup> well.

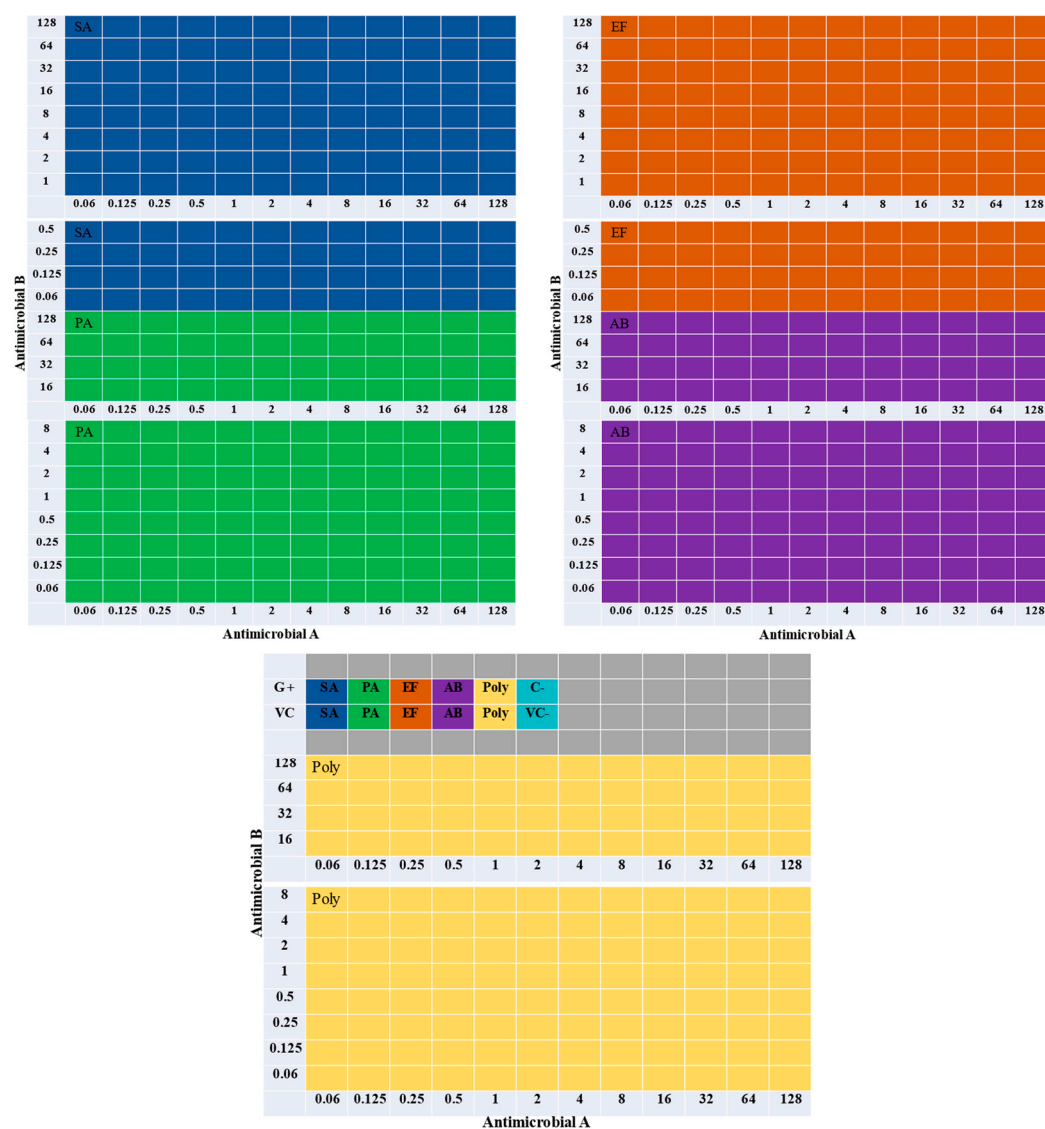

**Supplementary Figure S3.** The completed checkerboard setup for these experiments consisted of eight 96-well plates with the four species and the community split between them. Depiction of the complete checkerboard shows that each species had 144 wells of antibiotic split across two 96-well plates, a growth control well, and a vehicle control well. A contamination check with and without the vehicle was also present on another 96-well plate.

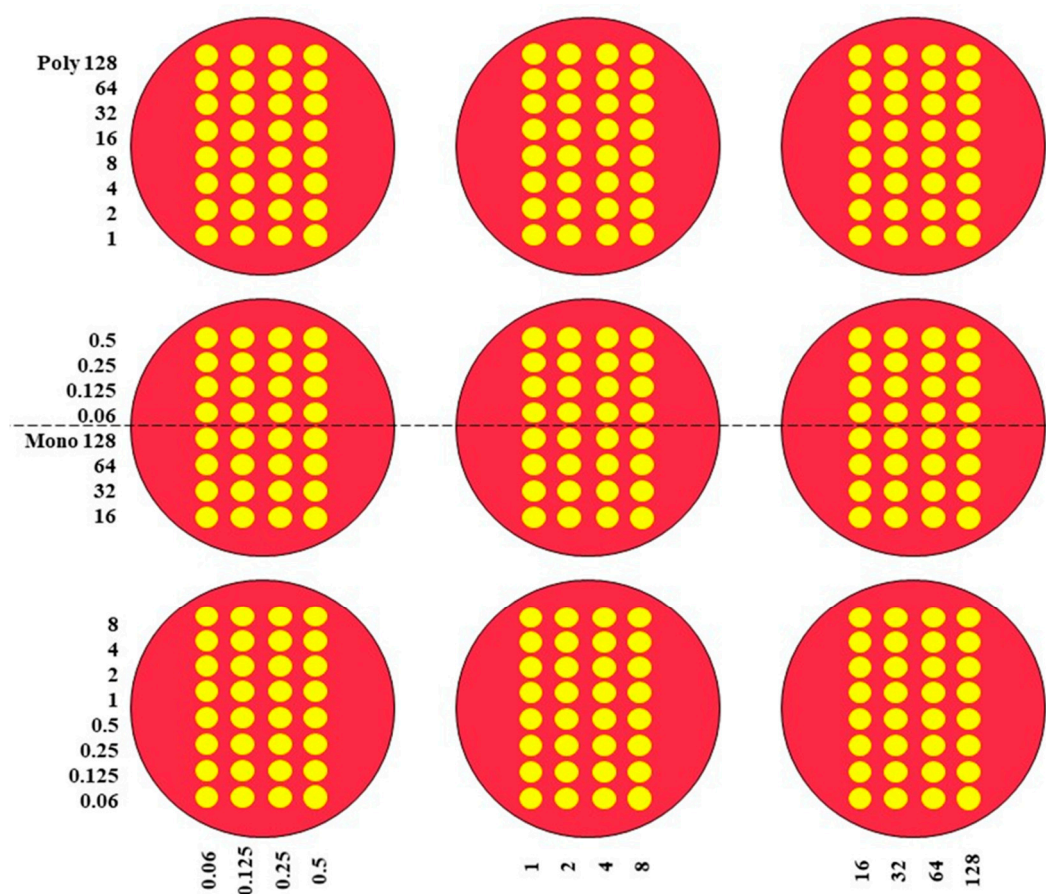

**Supplementary Figure S4.** CFUs were obtained by plating 5  $\mu$ L onto selective/differential media, and then incubating them for 18–24 h. Depiction of plate setup. A total of 5  $\mu$ L plated onto selective/differential media. The above setup existed for each individual species. The growth control and vehicle control were plated at the edge of a plate. CFU counts were obtained after incubation by multiplying by two to represent what would have been obtained if 10  $\mu$ L had been plated.

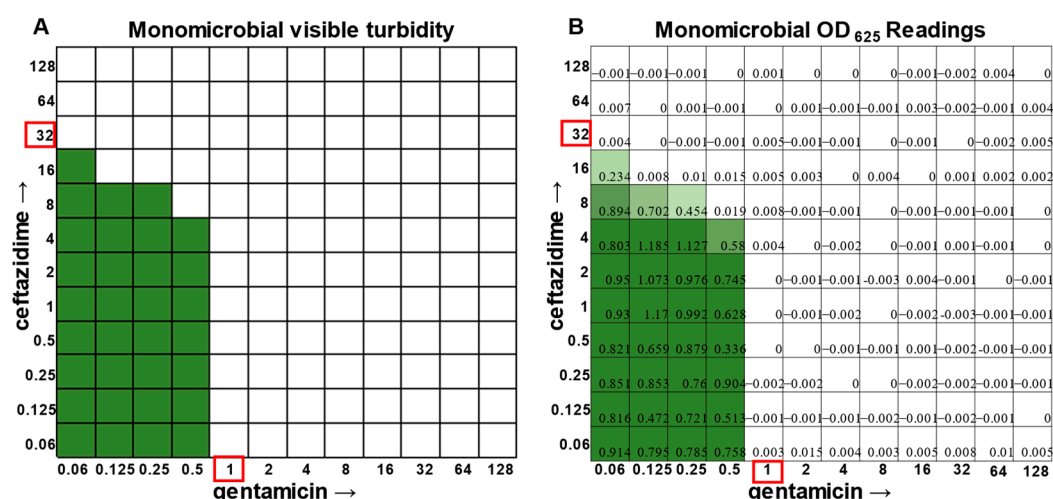

**Supplementary Figure S5.** No discernable differences between observed visible turbidity and optical density (OD) readings were detected. OD<sub>625</sub> readings were taken for each species and the community after 18 h incubation with no discernable differences observed between visible turbidity detected by the human eye and OD<sub>625</sub> readings. The figure above shows data representative of this phenomenon, collected from monomicrobial *P. aeruginosa*. OD<sub>625</sub> values were standardized to 0.04 to account for background subtraction.

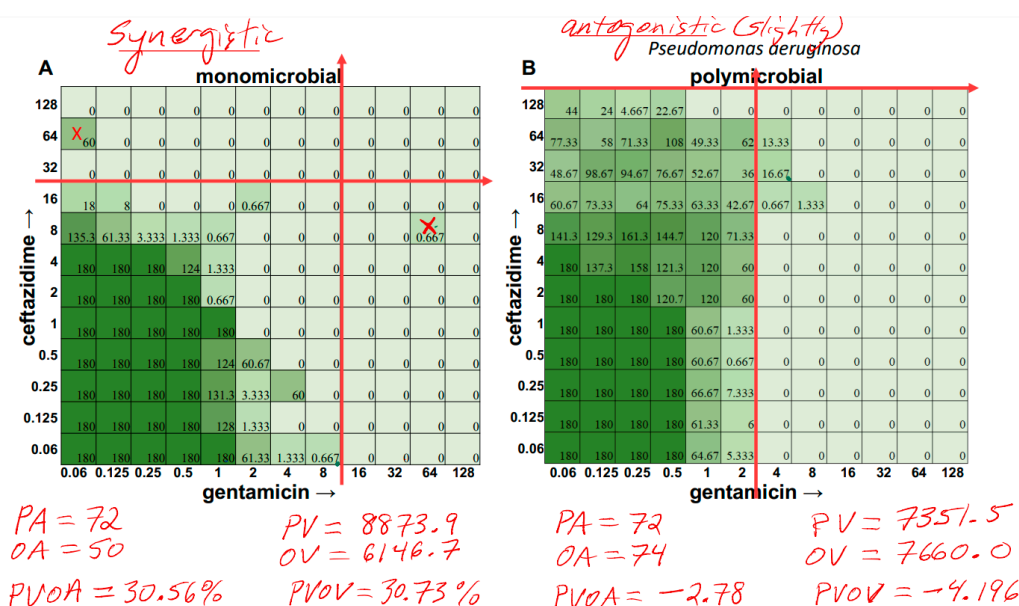

**Supplementary Figure S6.** Calculations of PVOA and PVOV confirm that the combination of gentamicin and ceftazidime is antagonistic for *P. aeruginosa* present in the polymicrobial community as compared to synergistic, when tested alone. Using the calculations described in the methodology, it was determined that while ceftazidime and gentamicin appear to be a synergistic combination when tested against *P. aeruginosa* monomicrobially (with a PVOA and PVOV of 30.56 and 30.73, respectively), when tested against *P. aeruginosa* in the polymicrobial condition, the same antibiotic combination was revealed to be antagonistic with a PVOA and a PVOV of -2.78 and -4.196, respectively.

**Supplementary Table S1.** Inoculum CFU mL<sup>-1</sup> obtained for each species shows inoculums were very similar across species in the polymicrobial condition. Average CFU mL<sup>-1</sup> for each species' inoculum for both the monomicrobial and polymicrobial conditions. The standard deviation is also included.

| Species  | Mono Avg. CFU/mL       | Mono St. Dev.          | Poly Avg. CFU/mL       | Poly St. Dev.          |
|----------|------------------------|------------------------|------------------------|------------------------|
| SA 29213 | 4.28 × 10 <sup>6</sup> | 8.35 × 10 <sup>5</sup> | 1.38 × 10 <sup>6</sup> | 2.71 × 10 <sup>5</sup> |
| PA 27853 | 8.44 × 10 <sup>6</sup> | 4.10 × 10 <sup>6</sup> | 1.80 × 10 <sup>6</sup> | 4.24 × 10 <sup>5</sup> |
| EF 29212 | 6.22 × 10 <sup>5</sup> | 4.85 × 10 <sup>5</sup> | 8.67 × 10 <sup>5</sup> | 1.63 × 10 <sup>5</sup> |
| AB 19606 | 4.97 × 10 <sup>6</sup> | 7.52 × 10 <sup>5</sup> | 2.07 × 10 <sup>6</sup> | 9.49 × 10 <sup>5</sup> |
